# Supplementary material for: Genomic subtypes and cellular phenotypes of high-grade endometrial carcinoma
Source: Research Square preprint supplement (doi:10.21203/rs.3.rs-4673415/v1), 2024-09-04
Supplement: Supplementary file 2 [file 48bf596d797878d2193d84df.docx]

Table S1. List of samples analyzed in this study

| ID | Histology | Exome (0, excluded; 1, included) | RNA-seq (0, excluded; 1, included) | ARID1A-IHC | p53-IHC | PMS2-IHC | MSH6-IHC | ER-IHC | PR-IHC | PD-L1 (TPS) | PD-L1 (CPS) | MSI | *MLH1*me | CD8 density (cells/mm2) | RNA cluster | MMR status | Genomic subtype | Pathological subtype | TCGA subtype |
| --- | --- | --- | --- | --- | --- | --- | --- | --- | --- | --- | --- | --- | --- | --- | --- | --- | --- | --- | --- |
| ID-01 | Serous | 1 | 1 | Lost | Diffuse | Retained | Retained | 1 | 1 | 1 | 5 | MSS | Unme | 55.18 | 2 | MMRp | TP53 | TP53 | CN-H |
| ID-02 | Clear | 1 | 1 | Retained | fD | Retained | Retained | 5 | 1 | 1 | 5 | MSS | Unme | 128.65 | 0 | MMRp | TP53 | TP53 | CN-L |
| ID-03 | Other | 1 | 1 | Retained | fD | Lost | Retained | 1 | 60 | 1 | 10 | MSI-H | Me | 292.00 | 2 | MMRd | MSI-H | MMRd | MSI-H |
| ID-04 | Clear | 1 | 1 | Retained | Diffuse | Retained | Retained | 5 | 1 | 1 | 10 | MSS | Unme | 8.99 | 0 | MMRp | TP53 | TP53 | CN-L |
| ID-05 | Clear | 1 | 1 | Retained | Diffuse | Retained | Retained | 1 | 5 | 1 | 10 | MSS | Unme | 55.18 | 2 | MMRp | TP53 | TP53 | CN-H |
| ID-06 | Carcinosarcoma | 1 | 1 | Retained | WT | Retained | Retained | 10 | 60 | 1 | 1 | MSS | Unme | 12.01 | 2 | MMRp | NSMP | NSMP | CN-H |
| ID-07 | Clear | 1 | 1 | Lost | Diffuse | Retained | Retained | 1 | 20 | 1 | 1 | MSS | Unme | 97.30 | 2 | MMRp | TP53 | TP53 | CN-H |
| ID-08 | Clear-EM | 1 | 1 | Lost | WT | Retained | Lost | 60 | 40 | 1 | 10 | MSI-H | Unme | 655.17 | 0 | MMRd | MSI-H | MMRd | MSI-H |
| ID-09 | Clear | 1 | 1 | Retained | D | Retained | Retained | 1 | 1 | 5 | 10 | MSS | Unme | 22.96 | 0 | MMRp | TP53 | TP53 | CN-H |
| ID-10 | Clear-S | 1 | 1 | Retained | Diffuse | Retained | Retained | 1 | 1 | 5 | 10 | MSS | Unme | 35.84 | 0 | MMRp | TP53 | TP53 | CN-H |
| ID-11 | Clear | 1 | 1 | Lost | WT | Retained | Retained | 40 | 1 | 1 | 30 |  |  | 182.00 | 0 | MMRp | POLE | POLE | POLE |
| ID-12 | Clear-S | 1 | 1 | Retained | Diffuse | Retained | Retained | 1 | 10 | 1 | 20 |  |  | 865.62 | 0 | MMRp | TP53 | TP53 | CN-H |
| ID-13 | Clear | 1 | 1 | Lost | WT | Retained | Retained | 1 | 1 | 20 | 30 |  |  | 65.29 | 0 | MMRp | NSMP | NSMP | CN-L |
| ID-14 | Clear-EM | 1 | 1 | Lost | fD | Retained | Lost | 30 | 10 | 30 | 50 |  |  | 874.18 | 1 | MMRd | MSI-H | MMRd | MSI-H |
| ID-15 | Serous | 1 | 1 | Retained | Diffuse | Retained | Retained | 40 | 20 | 1 | 5 | MSS | Unme | 41.56 | 1 | MMRp | TP53 | TP53 | CN-H |
| ID-16 | Serous | 1 | 1 | Retained | Diffuse | Retained | Retained | 5 | 1 | 5 | 5 | MSS | Unme | 114.88 | 0 | MMRp | TP53 | TP53 | CN-L |
| ID-17 | Clear | 1 | 1 | fLost | WT | Retained | Retained | 1 | 1 | 50 | 60 | MSS | Unme | 513.12 | 0 | MMRp | NSMP | NSMP | CN-H |
| ID-18 | EMG3 | 1 | 1 | Lost | WT | Lost | Retained | 80 | 90 | 30 | 90 | MSI-H | Me | 2385.99 | 2 | MMRd | MSI-H | MMRd | MSI-H |
| ID-19 | Carcinosarcoma | 1 | 0 | Retained | Diffuse | Retained | Retained | 1 | 1 | 1 | 1 | MSS | Unme | 13.41 |  | MMRp | NSMP | TP53 | CN-H |
| ID-20 | Carcinosarcoma | 1 | 0 | Retained | Diffuse | Retained | Retained | 10 | 10 | 5 | 10 | MSS | Unme | 57.43 |  | MMRp | TP53 | TP53 | CN-L |
| ID-21 | Carcinosarcoma | 1 | 1 | Lost | Diffuse | Retained | Lost | 10 | 40 | 1 | 20 | MSI-H | Unme | 421.76 | 0 | MMRd | MSI-H | MMRd | MSI-H |
| ID-22 | Carcinosarcoma | 1 | 1 | fLost | fD | Retained | fLost | 10 | 60 | 30 | 50 | MSI-H | Unme | 2140.02 | 0 | MMRd | POLE | POLE | POLE |
| ID-23 | Carcinosarcoma | 1 | 0 | Retained | fD | Lost | Retained | 30 | 10 | 10 | 30 | MSS | Unme | 616.79 |  | MMRd | POLE | POLE | POLE |
| ID-24 | Other | 1 | 1 | Retained | WT | Retained | Retained | 1 | 1 | 90 | 100 | MSS | Unme | 1002.68 | 0 | MMRp | NSMP | NSMP | CN-L |
| ID-25 | EMG3 | 1 | 1 | Lost | WT | Lost | Retained | 70 | 10 | 30 | 50 | MSI-H | Me | 1708.79 | 0 | MMRd | MSI-H | MMRd | MSI-H |
| ID-26 | EMG3 | 1 | 1 | Lost | WT | Lost | fLost | 5 | 1 | 70 | 100 | MSI-H | Me | 4962.70 | 0 | MMRd | MSI-H | MMRd | MSI-H |
| ID-27 | Serous | 1 | 1 | Lost | Diffuse | Retained | Lost | 1 | 5 | 30 | 100 | MSI-H | Unme | 4392.97 | 0 | MMRd | MSI-H | MMRd | MSI-H |
| ID-28 | Clear | 1 | 1 | Retained | WT | Retained | Retained | 1 | 1 | 1 | 5 | MSS | Unme | 628.39 | 0 | MMRp | NSMP | NSMP | CN-H |
| ID-29 | Clear | 1 | 1 | fLost | Diffuse | Lost | Retained | 1 | 1 | 5 | 20 | MSI-H | Unme | 1536.92 | 0 | MMRd | POLE | POLE | POLE |
| ID-30 | Clear | 1 | 1 | Lost | WT | Retained | Retained | 1 | 10 | 10 | 20 | MSS | Unme | 190.50 | 0 | MMRp | NSMP | NSMP | CN-L |
| ID-31 | EMG3 | 1 | 1 | Retained | WT | Retained | Retained | 70 | 30 | 40 | 70 | MSS | Unme | 934.83 | 1 | MMRp | POLE | POLE | POLE |
| ID-32 | EMG3 | 1 | 1 | Retained | WT | fLost | Retained | 70 | 10 | 1 | 5 | MSI-H | Unme | 173.10 | 0 | MMRd | POLE | POLE | POLE |
| ID-33 | EMG3 | 1 | 1 | Lost | WT | Retained | Lost | 70 | 30 | 5 | 30 | MSI-H | Unme | 821.12 | 1 | MMRd | MSI-H | MMRd | MSI-H |
| ID-34 | EMG3 | 1 | 1 | Lost | WT | Retained | Retained | 60 | 40 | 1 | 5 | MSS | Unme | 769.64 | 1 | MMRp | NSMP | NSMP | CN-L |
| ID-35 | EMG3 | 1 | 1 | Retained | WT | Retained | Retained | 70 | 70 | 1 | 1 | MSS | Unme | 255.35 | 1 | MMRp | NSMP | NSMP | CN-L |
| ID-36 | EMG3 | 1 | 1 | Lost | WT | Retained | Retained | 20 | 30 | 1 | 5 | MSS | Unme | 202.95 | 1 | MMRp | POLE | POLE | POLE |
| ID-37 | EMG3 | 1 | 1 | fLost | fD | Retained | Retained | 40 | 30 | 1 | 20 | MSS | Unme | 418.33 | 1 | MMRp | POLE | POLE | POLE |
| ID-38 | EMG3 | 1 | 1 | Lost | Diffuse | Retained | Retained | 60 | 5 | 40 | 70 | MSS | Unme | 491.14 | 0 | MMRp | TP53 | TP53 | CN-L |
| ID-39 | Clear-EM | 1 | 1 | Lost | WT | fLost | Retained | 5 | 10 | 1 | 1 | MSI-H | Me | 43.03 | 1 | MMRd | MSI-H | MMRd | MSI-H |
| ID-40 | Clear-EM | 1 | 1 | Lost | WT | Lost | Retained | 10 | 5 | 30 | 100 | MSI-H | Me | 4785.15 | 0 | MMRd | MSI-H | MMRd | MSI-H |
| ID-41 | Carcinosarcoma | 1 | 1 | Retained | Diffuse | Retained | Retained | 10 | 20 | 1 | 5 | MSS | Unme | 204.93 | 2 | MMRp | TP53 | TP53 | CN-H |
| ID-42 | Serous | 1 | 1 | Retained | Diffuse | Retained | Retained | 80 | 60 | 1 | 5 | MSS | Unme | 322.53 | 0 | MMRp | TP53 | TP53 | CN-H |
| ID-43 | Serous | 1 | 1 | Retained | Diffuse | Retained | Retained | 1 | 1 | 40 | 80 | MSS | Unme | 1790.59 | 0 | MMRp | TP53 | TP53 | CN-H |
| ID-44 | Serous | 1 | 1 | Retained | Diffuse | Retained | Retained | 1 | 1 | 1 | 5 | MSS | Unme | 400.75 | 3 | MMRp | NSMP | TP53 | CN-L |
| ID-45 | Serous | 1 | 1 | Retained | Diffuse | Retained | Retained | 5 | 5 | 1 | 5 | MSS | Unme | 317.92 | 2 | MMRp | TP53 | TP53 | CN-H |
| ID-46 | Serous | 1 | 1 | Retained | Null | Retained | Retained | 1 | 1 | 1 | 5 | MSS | Unme | 237.76 | 0 | MMRp | TP53 | TP53 | CN-H |
| ID-47 | EMG3 | 1 | 1 | Retained | WT | Retained | Retained | 30 | 40 | 1 | 20 | MSS | Unme | 377.53 | 1 | MMRp | TP53 | NSMP | CN-H |
| ID-48 | Clear | 1 | 1 | Retained | Diffuse | Retained | Retained | 20 | 1 | 5 | 10 | MSS | Unme | 55.75 | 0 | MMRp | TP53 | TP53 | CN-H |
| ID-49 | Serous | 1 | 1 | Retained | fD | Retained | Retained | 30 | 1 | 1 | 5 | MSS | Unme | 148.72 | 0 | MMRp | TP53 | TP53 | CN-H |
| ID-50 | Clear-EM | 1 | 1 | Lost | fD | Retained | Retained | 40 | 40 | 10 | 20 | MSS | Unme | 150.01 | 0 | MMRp | TP53 | TP53 | CN-L |
| ID-51 | Serous | 1 | 1 | Retained | Diffuse | Retained | Lost | 60 | 5 | 10 | 40 | MSI-H | Unme | 103.16 | 0 | MMRd | POLE | POLE | POLE |
| ID-52 | Clear-EM | 1 | 1 | Retained | Null | Retained | Retained | 1 | 1 | 1 | 10 | MSS | Unme | 569.91 | 0 | MMRp | TP53 | TP53 | CN-H |
| ID-53 | Serous | 1 | 1 | Retained | Null | Retained | Retained | 20 | 50 | 5 | 10 | MSS | Unme | 111.58 | 0 | MMRp | NSMP | TP53 | CN-H |
| ID-54 | Clear-EM | 1 | 1 | Lost | WT | Lost | Retained | 30 | 1 | 10 | 30 | MSI-H | Unme | 1151.56 | 1 | MMRd | MSI-H | MMRd | MSI-H |
| ID-55 | Clear | 1 | 1 | Retained | Diffuse | Retained | Retained | 1 | 1 | 1 | 10 | MSS | Unme | 4.31 | 0 | MMRp | TP53 | TP53 | CN-H |
| ID-56 | Carcinosarcoma | 1 | 1 | fLost | WT | Retained | Retained | 1 | 1 | 1 | 1 | MSS | Unme | 510.51 | 2 | MMRp | NSMP | NSMP | CN-H |
| ID-57 | EMG3 | 1 | 1 | Retained | WT | Retained | Retained | 90 | 40 | 1 | 15 | MSI-H | Unme | 266.88 | 1 | MMRp | POLE | POLE | POLE |
| ID-58 | Serous | 1 | 1 | Retained | Diffuse | Retained | Retained | 1 | 1 | 1 | 20 | MSS | Unme | 103.53 | 2 | MMRp | TP53 | TP53 | CN-L |
| ID-59 | EMG3 | 1 | 1 | Retained | WT | Retained | Retained | 5 | 5 | 1 | 1 | MSS | Unme | 9.69 | 1 | MMRp | NSMP | NSMP | CN-L |
| ID-60 | Carcinosarcoma | 1 | 1 | Retained | Null | Retained | Retained | 1 | 1 | 70 | 100 | MSS | Unme | 804.38 | 2 | MMRp | NSMP | TP53 | CN-H |
| ID-61 | Serous | 1 | 1 | Retained | Diffuse | Retained | Retained | 30 | 10 | 1 | 5 | MSS | Unme | 34.52 | 2 | MMRp | TP53 | TP53 | CN-H |
| ID-62 | Serous | 1 | 1 | Retained | Diffuse | Retained | Retained | 50 | 10 | 1 | 1 | MSS | Unme | 21.84 | 2 | MMRp | TP53 | TP53 | CN-L |
| ID-63 | Carcinosarcoma | 1 | 1 | Retained | Diffuse | Retained | Retained | 10 | 5 | 1 | 5 | MSS | Unme | 21.84 | 2 | MMRp | NSMP | TP53 | CN-H |
| ID-64 | EMG3 | 1 | 1 | Retained | Diffuse | Retained | Retained | 1 | 30 | 1 | 10 | MSS | Unme | 167.40 | 1 | MMRp | POLE | POLE | POLE |
| ID-65 | Carcinosarcoma | 1 | 1 | Retained | WT | Retained | Retained | 1 | 1 | 1 | 1 | MSS | Unme | 26.52 | 2 | MMRp | NSMP | NSMP | CN-H |
| ID-66 | Carcinosarcoma | 1 | 1 | Retained | Diffuse | Retained | Retained | 1 | 10 | 1 | 10 | MSS | Unme | 36.86 | 2 | MMRp | TP53 | TP53 | CN-H |
| ID-67 | Carcinosarcoma | 1 | 1 | fLost | Diffuse | Retained | Retained | 1 | 1 | 1 | 10 | MSS | Unme | 172.77 | 2 | MMRp | TP53 | TP53 | CN-H |
| ID-68 | Serous | 1 | 1 | Retained | Diffuse | Retained | Retained | 80 | 60 | 5 | 10 | MSS | Unme | 63.54 | 0 | MMRp | TP53 | TP53 | CN-H |
| ID-69 | Carcinosarcoma | 1 | 1 | Retained | WT | Retained | Retained | 1 | 10 | 1 | 1 | MSS | Unme | 1.76 | 1 | MMRp | NSMP | NSMP | CN-L |
| ID-70 | Carcinosarcoma | 1 | 1 | fLost | fD | Lost | Retained | 30 | 20 | 5 | 20 | MSI-H | Me | 165.59 | 1 | MMRd | MSI-H | MMRd | MSI-H |
| ID-71 | EMG3 | 1 | 1 | Retained | Diffuse | Retained | Retained | 1 | 1 | 1 | 1 | MSS | Unme | 23.69 | 2 | MMRp | TP53 | TP53 | CN-H |
| ID-72 | EMG3 | 1 | 1 | Lost | WT | Retained | Retained | 5 | 5 | 1 | 10 | MSS | Unme | 392.81 | 1 | MMRp | POLE | POLE | POLE |
| ID-73 | EMG3 | 1 | 1 | Lost | WT | Lost | Retained | 90 | 90 | 1 | 10 | MSI-H | Me | 583.02 | 1 | MMRd | MSI-H | MMRd | MSI-H |
| ID-74 | Carcinosarcoma | 1 | 1 | Retained | Diffuse | Retained | Retained | 10 | 10 | 1 | 1 | MSS | Unme | 2.10 | 2 | MMRp | TP53 | TP53 | CN-L |
| ID-75 | Carcinosarcoma | 1 | 1 | Retained | fD | Retained | Retained | 5 | 30 | 1 | 10 | MSS | Unme | 33.37 | 2 | MMRp | TP53 | TP53 | CN-H |
| ID-76 | EMG3 | 1 | 1 | Retained | WT | Retained | Retained | 80 | 40 | 60 | 80 | MSS | Unme | 1574.41 | 2 | MMRp | NSMP | NSMP | CN-L |
| ID-77 | Carcinosarcoma | 1 | 1 | Retained | Null | Retained | Retained | 1 | 20 | 1 | 5 | MSS | Unme | 49.22 | 2 | MMRp | NSMP | TP53 | CN-H |
| ID-78 | Carcinosarcoma | 1 | 1 | Retained | Diffuse | Retained | Retained | 60 | 10 | 1 | 10 | MSS | Unme | 20.89 | 2 | MMRp | TP53 | TP53 | CN-H |
| ID-79 | Carcinosarcoma | 1 | 1 | Retained | Null | Retained | Retained | 1 | 1 | 1 | 1 | MSS | Unme | 80.12 | 2 | MMRp | TP53 | TP53 | CN-H |
| ID-80 | Carcinosarcoma | 1 | 1 | Retained | Diffuse | Retained | Retained | 40 | 10 | 1 | 5 | MSS | Unme | 24.21 | 2 | MMRp | TP53 | TP53 | CN-H |
| ID-81 | Clear | 1 | 1 | Retained | Diffuse | Retained | Retained | 30 | 10 | 5 | 25 | MSS | Unme | 95.19 | 2 | MMRp | NSMP | TP53 | CN-L |
| ID-82 | G1G2 | 1 | 1 |  |  |  |  |  |  |  |  | MSI-H | Me |  | 1 |  | G1G2 | G1G2 | G1G2 |
| ID-83 | G1G2 | 1 | 1 |  |  |  |  |  |  |  |  | MSI-H | Me |  | 1 |  | G1G2 | G1G2 | G1G2 |
| ID-84 | G1G2 | 1 | 1 |  |  |  |  |  |  |  |  | MSI-H | Unme |  | 0 |  | G1G2 | G1G2 | G1G2 |
| ID-85 | G1G2 | 1 | 1 |  |  |  |  |  |  |  |  | MSI-H | Me |  | 1 |  | G1G2 | G1G2 | G1G2 |
| ID-86 | G1G2 | 1 | 1 |  |  |  |  |  |  |  |  | MSI-H | Unme |  | 1 |  | G1G2 | G1G2 | G1G2 |
| ID-87 | G1G2 | 1 | 1 |  |  |  |  |  |  |  |  | MSI-H | Me |  | 0 |  | G1G2 | G1G2 | G1G2 |
| ID-88 | G1G2 | 1 | 1 |  |  |  |  |  |  |  |  | MSI-H | Unme |  | 0 |  | G1G2 | G1G2 | G1G2 |
| ID-89 | G1G2 | 0 | 1 |  |  |  |  |  |  |  |  | MSI-H | Me |  | 1 |  | G1G2 | G1G2 | G1G2 |

EMG3, grade 3 endometroid carcinoma; Clear-EM, clear cell carcinoma with endometrioid carcinoma component; Clear-S, clear cell carcinoma with serous carcinoma component; CN-H, copy-number high; CN-L, copy number low; CPS, combined positive score; fD, focal diffuse; fLost, focal lost; G1G2, grade 1–2 endometroid carcinoma; IHC, immunohistochemistry; Me, methylated; MLH1 me, MLH1 methylated; MMR, mismatch repair; MMRd mismatch repair deficient; MMRp, mismatch repair proficient; MSI, microsatellite instability; MSI-H, high microsatellite instability; MSS, microsatellite stable; NSMP, no specific molecular profile; TCGA, The Cancer Genome Atlas program; TPS, tumor proportion score; Unme, unmethylated; WT, wild type.

Table S2. Somatic nonsynonymous mutations in *BRCA1* and *BRCA2*

| Sample | Subtype | Gene | HGVS.p | HGVS.c | Pos | Ref | Alt | Annotation | Variant allele frequency (%) |
| --- | --- | --- | --- | --- | --- | --- | --- | --- | --- |
| ID-10 | TP53 | *BRCA1* | p.Ile125Thr | c.374T>C | 43104189 | A | G | missense_variant | 58.7 |
| ID-11 | POLE | *BRCA1* | p.Lys1601Thr | c.4802A>C | 43071112 | T | G | missense_variant | 17.4 |
| ID-21 | MSI-H | *BRCA1* | p.Lys339Asn | c.1017G>T | 43094514 | C | A | missense_variant | 34.4 |
| ID-22 | POLE | *BRCA1* | p.Thr790Asn | c.2369C>A | 43093162 | G | T | missense_variant | 50.0 |
| ID-26 | MSI-H | *BRCA1* | p.Ser1486Gly | c.4456A>G | 43076516 | T | C | missense_variant | 33.6 |
| ID-31 | POLE | *BRCA1* | p.Glu362Asp | c.1086G>T | 43094445 | C | A | missense_variant | 46.1 |
| ID-36 | POLE | *BRCA1* | p.Leu416Ile | c.1246C>A | 43094285 | G | T | missense_variant | 52.8 |
| ID-51 | POLE | *BRCA1* | p.Met1728Ile | c.5184G>A | 43063342 | C | T | missense_variant | 20.0 |
| ID-51 | POLE | *BRCA1* | p.Thr582Met | c.1745C>T | 43093786 | G | A | missense_variant | 23.3 |
| ID-51 | POLE | *BRCA1* | p.Thr176Met | c.527C>T | 43099795 | G | A | missense_variant | 22.7 |
| ID-57 | POLE | *BRCA1* | p.Ser1484Tyr | c.4451C>A | 43076521 | G | T | missense_variant | 59.3 |
| ID-72 | POLE | *BRCA1* | p.Glu337* | c.1009G>T | 43094522 | C | A | stop_gained | 22.2 |
| ID-12 | TP53 | *BRCA2* | _ | c.8633-1G>C | 32376669 | G | C | splice_acceptor_variant&intron_variant | 70.5 |
| ID-22 | POLE | *BRCA2* | p.Asp430Tyr | c.1288G>T | 32332766 | G | T | missense_variant | 40.0 |
| ID-22 | POLE | *BRCA2* | p.Arg3276Ile | c.9827G>T | 32398340 | G | T | missense_variant | 36.4 |
| ID-29 | POLE | *BRCA2* | p.Gly2578Glu | c.7733G>A | 32357857 | G | A | missense_variant | 15.8 |
| ID-29 | POLE | *BRCA2* | p.Arg3128* | c.9382C>T | 32394814 | C | T | stop_gained | 23.2 |
| ID-29 | POLE | *BRCA2* | p.Pro3229Leu | c.9686C>T | 32398199 | C | T | missense_variant | 26.0 |
| ID-31 | POLE | *BRCA2* | p.Thr441Asn | c.1322C>A | 32332800 | C | A | missense_variant | 34.1 |
| ID-31 | POLE | *BRCA2* | p.Glu731* | c.2191G>T | 32336546 | G | T | stop_gained | 12.7 |
| ID-31 | POLE | *BRCA2* | p.Asn1297Thr | c.3890A>C | 32338245 | A | C | missense_variant | 23.3 |
| ID-31 | POLE | *BRCA2* | p.Phe1449Leu | c.4347C>A | 32338702 | C | A | missense_variant | 29.7 |
| ID-31 | POLE | *BRCA2* | p.Val2076Gly | c.6227T>G | 32340582 | T | G | missense_variant | 41.5 |
| ID-31 | POLE | *BRCA2* | p.Asp2489Tyr | c.7465G>T | 32356457 | G | T | missense_variant | 56.3 |
| ID-33 | MSI-H | *BRCA2* | p.Lys1691fs | c.5073delA | 32339421 | CA | C | frameshift_variant | 25.7 |
| ID-34 | NSMP | *BRCA2* | p.Cys711Ser | c.2132G>C | 32336487 | G | C | missense_variant | 27.0 |
| ID-36 | POLE | *BRCA2* | p.Ser942* | c.2825C>A | 32337180 | C | A | stop_gained | 28.6 |
| ID-36 | POLE | *BRCA2* | p.Lys1649Ile | c.4946A>T | 32339301 | A | T | missense_variant | 40.0 |
| ID-36 | POLE | *BRCA2* | p.Arg1704Lys | c.5111G>A | 32339466 | G | A | missense_variant | 60.0 |
| ID-36 | POLE | *BRCA2* | p.Ser3319Tyr | c.9956C>A | 32398469 | C | A | missense_variant | 25.0 |
| ID-37 | POLE | *BRCA2* | p.Leu951Ile | c.2851C>A | 32337206 | C | A | missense_variant | 32.7 |
| ID-37 | POLE | *BRCA2* | p.Val1076Ala | c.3227T>C | 32337582 | T | C | missense_variant | 28.9 |
| ID-37 | POLE | *BRCA2* | p.Arg2842Cys | c.8524C>T | 32370992 | C | T | missense_variant | 40.7 |
| ID-37 | POLE | *BRCA2* | p.Ile3259Thr | c.9776T>C | 32398289 | T | C | missense_variant | 41.6 |
| ID-37 | POLE | *BRCA2* | p.Glu3309Lys | c.9925G>A | 32398438 | G | A | missense_variant | 27.8 |
| ID-51 | POLE | *BRCA2* | _ | c.425+1G>A | 32325185 | G | A | splice_donor_variant&intron_variant | 39.4 |
| ID-51 | POLE | *BRCA2* | p.His595Tyr | c.1783C>T | 32333261 | C | T | missense_variant | 23.4 |
| ID-51 | POLE | *BRCA2* | p.Glu790* | c.2368G>T | 32336723 | G | T | stop_gained | 32.5 |
| ID-57 | POLE | *BRCA2* | p.Pro606Leu | c.1817C>T | 32333295 | C | T | missense_variant | 15.8 |
| ID-57 | POLE | *BRCA2* | p.Gln1181Pro | c.3542A>C | 32337897 | A | C | missense_variant | 39.7 |
| ID-57 | POLE | *BRCA2* | p.Leu1604Arg | c.4811T>G | 32339166 | T | G | missense_variant | 52.5 |
| ID-72 | POLE | *BRCA2* | p.Glu1493* | c.4477G>T | 32338832 | G | T | stop_gained | 32.0 |
| ID-72 | POLE | *BRCA2* | _ | c.7436-1G>T | 32356427 | G | T | splice_acceptor_variant&intron_variant | 27.5 |
| ID-73 | MSI-H | *BRCA2* | p.Lys3416fs | c.10248delA | 32398755 | TA | T | frameshift_variant | 34.6 |
| ID-76 | NSMP | *BRCA2* | p.Phe590Cys | c.1769T>G | 32333247 | T | G | missense_variant | 12.5 |

**Table S3. List of selected genes used for clustering**

| Gene |
| --- |
| *ACTA2* |
| *ADIRF* |
| *AREG* |
| *BBS9* |
| *BBS10* |
| *BST2* |
| *C1orf194* |
| *C20orf85* |
| *CAPS* |
| *CDH2* |
| *CLDN10* |
| *CLDN4* |
| *CLIC3* |
| *COL1A2* |
| *COL6A1* |
| *CRIP1* |
| *CRYAB* |
| *CST1* |
| *CX3CL1* |
| *CXCL10* |
| *CXCL14* |
| *CXCL2* |
| *DEFB1* |
| *DEFB4A* |
| *DNALI1* |
| *ELF4* |
| *ESR1* |
| *FOSL2* |
| *FOXJ1* |
| *FOXO1* |
| *FZD3* |
| *GDPD3* |
| *GLI2* |
| *GLI3* |
| *GPX3* |
| *HES4* |
| *HES6* |
| *HNF1B* |
| *ICAM1* |
| *IDH1* |
| *IFI6* |
| *IGFBP7* |
| *INSR* |
| *KLF5* |
| *KRT7* |
| *KRT17* |
| *KRT18* |
| *KRT23* |
| *LEFTY1* |
| *LGALS1* |
| *LGR5* |
| *LINC01133* |
| *MAP2K6* |
| *MMP2* |
| *MMP7* |
| *MSLN* |
| *MT1F* |
| *MT1G* |
| *MUC1* |
| *MUC16* |
| *MYB* |
| *MYL9* |
| *NOTCH2* |
| *PAEP* |
| *PCDH17* |
| *PECAM1* |
| *PGR* |
| *PIFO* |
| *PIGR* |
| *PPARG* |
| *PRL* |
| *RFX3* |
| *RNASE1* |
| *S100A9* |
| *S100P* |
| *SCGB1D2* |
| *SCGB1D4* |
| *SCGB2A1* |
| *SERPINA5* |
| *SLC15A1* |
| *SLC26A2* |
| *SLC3A1* |
| *SLPI* |
| *SMAD3* |
| *SMS* |
| *SOX17* |
| *SOX9* |
| *SPATA18* |
| *SPP1* |
| *TMEM231* |
| *TNNC1* |
| *TP73* |
| *TPPP3* |
| *VIM* |
| *WFDC2* |
| *WNT7A* |
| *ZEB1* |

Table S4. Selected genes to calculate phenotypic scores

| Phenotype | Genes |
| --- | --- |
| Ciliated | *FOXJ1,TP73,RFX3,CAPS,TPPP3,SPATA18,MYB,TMEM231,DNAH11,DNAH12,KIF24* |
| Glandular/lumenal | *WNT7A,KRT7,FOSL2,DEFB1,MUC1,MUC5B,GPX3,ELF4* |
| Carcinosarcoma | *GLI2,GLI3,BBS9,NOTCH2,TWIST1,ZEB1,CDH2* |
